# Supplementary material
Source: PubMed Central journal article supplement (PMC7323857)
Supplement: NIHMS1593939-supplement-Sup1.pdf [file NIHMS1593939-supplement-Sup1.pdf]

|                            | Company                    | Model #       | Fuel                                          | Fuel Tank | Fuel Consumption Rate             | BTU       | Air Flow (CFM) | Volts/Amps   | KW         | Temp Rise from Ambient | Weight (lbs) | Dimensions (inches) | Country of Origin | Price     | Rental                                                   | website                                                                                                                                                                                                                                                                                             |
|----------------------------|----------------------------|---------------|-----------------------------------------------|-----------|-----------------------------------|-----------|----------------|--------------|------------|------------------------|--------------|---------------------|-------------------|-----------|----------------------------------------------------------|-----------------------------------------------------------------------------------------------------------------------------------------------------------------------------------------------------------------------------------------------------------------------------------------------------|
| <b>Electric Heaters</b>    | Green Tech Solutions       | ePro 400      | Electric                                      | NA        | NA                                | 21,500    | 3,500          | 120/45       | NA         | NA                     | 45           | 23x17x23            | USA               | \$ 1,799  | NA                                                       | <a href="http://www.greentechheat.com">www.greentechheat.com</a>                                                                                                                                                                                                                                    |
|                            | Moseback Manufacturing     | HX60          | Electric                                      | NA        | NA                                | 205,000   | 2,400          | 480 3PH/73   | 20/40/60   | NA                     | 180          | 31x19x25            | USA               | 6K        | NA                                                       | <a href="http://www.mosebachresistors.com">www.mosebachresistors.com</a>                                                                                                                                                                                                                            |
|                            |                            | HX150         | Electric                                      | NA        | NA                                | 502,000   | 5,500          | 480 3PH/181  | 50/100/150 | NA                     | 550          | 60x33x38            | USA               | 24K       | NA                                                       |                                                                                                                                                                                                                                                                                                     |
|                            | Omnitec Design, Inc.       | Vulcan RT     | Electric                                      | NA        | NA                                | 37,000    | 475            | 220/50       | NA         | 95°F                   | 63           | 11x17x30            | USA               | NA        | NA                                                       | <a href="http://omnitecdesign.com/product/vulcan-heater/">http://omnitecdesign.com/product/vulcan-heater/</a>                                                                                                                                                                                       |
|                            | Marley Engineered Products | MSDH6043      | Electric                                      | NA        | NA                                | 204,720   | NA             | 480 3PH/73.3 | 60         | 70-172°F               | 170          | 44x25x38            | USA               | \$ 8,000  | NA                                                       | <a href="https://www.marlevmep.com/products/marmk/msdh-series-high-temp-electric-blower">https://www.marlevmep.com/products/marmk/msdh-series-high-temp-electric-blower</a>                                                                                                                         |
|                            | TPI                        | P3P5548T      | Electric                                      | NA        | NA                                | 163,824   | 1,800          | 480 3PH/57.8 | NA         | 84°F                   | 126          | 18x31x30            | USA               | \$ 11,123 | NA                                                       | <a href="http://www.tpicorp.com/uploads/2/2/3/2/22337256/electrical.h.pdf">http://www.tpicorp.com/uploads/2/2/3/2/22337256/electrical.h.pdf</a>                                                                                                                                                     |
| <b>Liquid Fuel Heaters</b> | Green Tech Solutions       | Titan Propane | Propane                                       | NA        | NA                                | 500,000   | 5,000          | 120/7.5      | NA         | NA                     | 140          | 31x50x27            | USA               | \$ 6,750  | NA                                                       | <a href="http://www.greentechheat.com">www.greentechheat.com</a>                                                                                                                                                                                                                                    |
|                            | Jet Heat                   | GT1400 SA-M   | Ultra Low Sulfur (ULS) Diesel or ULS Kerosene | 20 Gal    | 3.2-5.3 GPH                       | 1,400,000 | 5,200          | NA           | NA         | 145-200°F              | 400          | 72x28x42            | USA               | \$75-80K  | \$2400/Week                                              | <a href="http://www.jetheat.com">www.jetheat.com</a>                                                                                                                                                                                                                                                |
|                            | Dewalt                     | DXH215HD      | Kerosene/JP8                                  | 14 Gal    | 1.6 GPH                           | 215,000   | 450            | NA           | NA         | NA                     | 120          | 24x36x48            | USA               | \$ 427    | NA                                                       | <a href="http://www.dewalt.com/en-us/products/gear-and-equipment/construction-heaters/215000-btuhr-forced-air-kerosene-construction-heater/dxh215hd">http://www.dewalt.com/en-us/products/gear-and-equipment/construction-heaters/215000-btuhr-forced-air-kerosene-construction-heater/dxh215hd</a> |
|                            | TempAir*                   | THP-1400      | NG/LP                                         | NA        | NA                                | 1,500,000 | 7,000          | 120/20       | NA         | 200°F                  | 378          | 61x32x48            | USA               | NA        | NA                                                       | <a href="http://www.temp-air.com">www.temp-air.com</a>                                                                                                                                                                                                                                              |
|                            | Mobile Air*                | 3050          | NG/LP                                         | NA        | NA                                | 4,000,000 | 16,000         | 220/30       | NA         | NA                     | 460          | 73x41x44            | USA               | \$ 14,800 | 1500/Month                                               | <a href="http://www.mobileair.com">www.mobileair.com</a>                                                                                                                                                                                                                                            |
| <b>Indirect Heaters</b>    | L.B. White*                | Foreman 750   | LP/NG/Diesel                                  | NA        | LP 34.5 LBS/HR or NG 750 CU.F./HR | 750,000   | 4,280          | 120/20       | NA         | NA                     | 700          | 32x53x94            | USA               | \$ 8,995  | 950/Month                                                | <a href="http://www.lbwhite.com/products/Construction-Heaters/Foreman-Indirect-fired-heater">http://www.lbwhite.com/products/Construction-Heaters/Foreman-Indirect-fired-heater</a>                                                                                                                 |
|                            | Generac*                   | MAC550F       | Diesel                                        | 111 Gal   | 2.9 GPH                           | 432,000   | 3,500          | NA           | NA         | 180°F                  | 6330         | 191x72x88           | USA               | \$90K     | NA                                                       |                                                                                                                                                                                                                                                                                                     |
|                            |                            | MAC1.2G       | Diesel                                        | 270 Gal   | 1.2 GPH                           | 1,200,000 | 6,500          | NA           | NA         | 180°F                  | 8265         | 255x96x102          | USA               | \$103K    | NA                                                       | <a href="http://www.generacmobileproducts.com/products/heaters">http://www.generacmobileproducts.com/products/heaters</a>                                                                                                                                                                           |
|                            |                            | MAC4.2G       | Diesel                                        | 146 Gal   | 1.2 GPH                           | 4,200,000 | 21,000         | NA           | NA         | 180°F                  | 13200        | 289x102x118         | USA               | \$207K    | NA                                                       |                                                                                                                                                                                                                                                                                                     |
|                            | TempAir*                   | MIDFO-800     | Diesel                                        | 200 Gal   | 7.14 GPH                          | 800,000   | 4,000          | NA           | 10KW       | 200°F                  | 5600         | 144x36x74           | USA               | \$56K     | \$5600/Month                                             | <a href="http://www.temp-air.com">www.temp-air.com</a>                                                                                                                                                                                                                                              |
|                            | Therm Dynamics*            | TD1200-400    | Diesel                                        | 400       | 9.3 GPH                           | 1,200,000 | 7,500          | NA           | NA         | 180°F                  | 6030         | 168x60x84           | USA               | 67K       | NA                                                       | <a href="http://www.thermdynamics.com">www.thermdynamics.com</a>                                                                                                                                                                                                                                    |
| Mobile Air*                | OHV500                     | NG/LP         | NA                                            | NA        | 450,000                           | 3,200     | 120/20         | NA           | NA         | 400                    | 60x24x49     | USA                 | \$ 8,995          | 950/Month | <a href="http://www.mobileair.com">www.mobileair.com</a> |                                                                                                                                                                                                                                                                                                     |

\* Several models available covering wide range of BTU output.
