# Supplementary material
Source: PubMed Central journal article supplement (PMC7323857)
Supplement: NIHMS1593939-supplement-Sup2.pdf [file NIHMS1593939-supplement-Sup2.pdf]

|               | Company                | Model #                           | Air Flow (CFM) | Required psi   | Require Liquid Flow (GPH) | Particle Size (microns) | Volts/Amps    | Temp Range (°F) | Weight (lbs) | Dimensions (inches) | Country of Origin | Price              | Rental | website                                                                                                                                                                                                           |
|---------------|------------------------|-----------------------------------|----------------|----------------|---------------------------|-------------------------|---------------|-----------------|--------------|---------------------|-------------------|--------------------|--------|-------------------------------------------------------------------------------------------------------------------------------------------------------------------------------------------------------------------|
|               | Smart Fog <sup>†</sup> | ES100                             | 2 to 10        | 100            | 42,800                    | 4.2                     | 120/2         | 30-150          | 50           | 24x24x72            | USA               | \$ 12,000          | NA     | <a href="http://www.smartfog.com/product/es100m">http://www.smartfog.com/product/es100m</a>                                                                                                                       |
|               | Aqua Fog* <sup>†</sup> | Hydro SS 700                      | 980            | NA             | 4                         | 40                      | 115/1.5       | 33-160          | 10           | 16x17x20            | USA               | \$ 485             | NA     | <a href="http://www.javbird-mfg.com/products/hydro-ss-series/bench-top/">http://www.javbird-mfg.com/products/hydro-ss-series/bench-top/</a>                                                                       |
|               | Aqua Fog* <sup>†</sup> | HRSM                              | 3,200          | NA             | 18 Gal Tank               | 5 to 35                 | 115/5.6       | 33-160          | 76           | 21x44               | USA               | \$ 1,947           | NA     | <a href="http://www.javbird-mfg.com/products/xe-mobile-series/crsm/">http://www.javbird-mfg.com/products/xe-mobile-series/crsm/</a>                                                                               |
| cold fog      | Amco                   | space humidifiers                 | 7              | 30             | 10                        | 20                      | 120           | NA              | 25           | 14x12x8             | USA               | \$ 2,360           | NA     | <a href="https://www.amco.com/spacehumidifiers.php">https://www.amco.com/spacehumidifiers.php</a>                                                                                                                 |
|               | FogCo                  | 96100                             | 25             | 80             | 5 per nozzle              | 1                       | 120           | 150             | 30           | 12x12x10            | USA               | \$ 2,600           | NA     | <a href="https://fogco.com/product-category/air-injection/">https://fogco.com/product-category/air-injection/</a>                                                                                                 |
|               | Microcool              | FFM1023                           | 400            | 1,000          | 22                        | 10 to 20                | 220/7         | 150             | 280          | 72x36x48            | USA               | \$ 19,754          | NA     | <a href="http://www.microcool.com/equipment/fog-humidification.htm">http://www.microcool.com/equipment/fog-humidification.htm</a>                                                                                 |
|               | Nortec                 | af-22                             | 2              | NA             | 6                         | NA                      | 115/3         | NA              |              | 8x22x10             | USA               | NA                 | NA     | <a href="https://www.humidity.com/humidifier-humidifiers/direct-room-adiabatic-humidification-systems/af22">https://www.humidity.com/humidifier-humidifiers/direct-room-adiabatic-humidification-systems/af22</a> |
|               | Air and waster systems | arcticmist pump<br>arcticmist fan | NA<br>3,800    | 1,000<br>1,000 | 1 GPM<br>10 per fan       | NA<br>3 to 45           | NA<br>120/2.8 | 150<br>150      | 70<br>22     | 24,36,36<br>20"     | USA               | \$ 4,500<br>\$ 895 | NA     | <a href="http://www.airandwatersystems.com/humidification/arcticmist.html">http://www.airandwatersystems.com/humidification/arcticmist.html</a>                                                                   |
| evaporative/s | Meg evap               | HV50                              | 20,000         | 60             | 50                        | NA                      | 230 3PH/13    | 130             | 375          | 66x60x48            | USA               | \$ 4,500           | NA     | <a href="http://www.megevap.com/hvta-30.asp">http://www.megevap.com/hvta-30.asp</a>                                                                                                                               |
| team          | Dristeem               | Vapormist                         | NA             | NA             | 2 to 25                   | steam                   | 480 3PH/41    | NA              | 101          | 24x18x18            | USA               | NA                 | NA     | <a href="http://www.dristeem.com/products/steam-generation/electric-steam-humidifiers/vapormist">http://www.dristeem.com/products/steam-generation/electric-steam-humidifiers/vapormist</a>                       |
|               | Humidifirst            | MP-25                             | NA             | NA             | 3                         | 1 to 5                  | 120/6         | NA              | 42           | 29x16x13            | USA               | \$ 5,500           | NA     | <a href="http://www.humidifirst.com/mp-specs.html">http://www.humidifirst.com/mp-specs.html</a>                                                                                                                   |
|               | Humidifirst            | MF-20                             | 640            | NA             | 5                         | 1                       | 115/5         | NA              | 225          | 36x25x84            | USA               | \$ 6,500           | NA     | <a href="http://www.humidifirst.com/mist-free.html">http://www.humidifirst.com/mist-free.html</a>                                                                                                                 |
|               | Humidity Source        | UH-303                            | NA             | 10 to 70       | 2                         | 4 to 7                  | 120/2.8       | NA              | 19.6         | 18x7x12             | USA               | NA                 | NA     | <a href="http://www.humiditysource.com/ultra.html">http://www.humiditysource.com/ultra.html</a>                                                                                                                   |
| ultrasonic    | Mainland mart          | ZS-40                             | NA             | NA             | 10                        | 1 to 10                 | 120/12        | NA              | 84           | 25x20x13            | USA               | \$ 1,850           | NA     | <a href="http://www.mainlandmart.com/humidify.html">http://www.mainlandmart.com/humidify.html</a>                                                                                                                 |
|               | Stulz                  | DRH                               | NA             | 30-75          | 1.6 to 6.3                | 1                       | 115/1         | 34 to 122 F     | 51           | 40x8x11             | USA               | NA                 | NA     | <a href="https://www.stulz-usa.com/en/ultrasonic-humidification/drh-ultrasonic/">https://www.stulz-usa.com/en/ultrasonic-humidification/drh-ultrasonic/</a>                                                       |
|               | Carel                  | UU08R1AS00                        | NA             | NA             | 10                        | 5                       | 120/6.3       | NA              | 48           | 13x11x34            | Italy             | \$ 5,377           | NA     | <a href="http://www.carelusa.com/product/humisonic-direct">http://www.carelusa.com/product/humisonic-direct</a>                                                                                                   |

\* Several models available covering wide range of BTU output.

<sup>†</sup> Possibly compatible with decon solutions
